# Supplementary material for: Aligning time-resolved kinetics (TAP) and surface spectroscopy (AP-XPS) for a more comprehensive understanding of ALD-derived 2D and 3D model catalysts
Source: Royal Society of Chemistry journal article supplement (doi:10.1039/d1fd00120e), 2022-01-01
Supplement: d1fd00120e1.pdf [file d1fd00120e1.pdf]

## **Aligning time-resolved kinetics (TAP) and surface spectroscopy (AP-XPS) for a more comprehensive understanding of ALD-derived 2D and 3D model catalysts.**

Evgeniy A. Redekop<sup>1\*</sup>, Hilde Poelman<sup>2</sup>, Matthias Filez<sup>2,3†</sup>, Ranjith K. Ramachandran<sup>3</sup>, Jolien Dendooven<sup>3</sup>, Christophe Detavernier<sup>3</sup>, Guy B. Marin<sup>2</sup>, Unni Olsbye<sup>1</sup>, and Vladimir V. Galvita<sup>2</sup>

<sup>1</sup> Centre for Materials Science and Nanotechnology (SMN), University of Oslo, Oslo, Norway

<sup>2</sup> Laboratory for Chemical Technology, Ghent University, Ghent, Belgium

<sup>3</sup> Conformal Coatings of Nanomaterials group, Ghent University, Ghent, Belgium

<sup>†</sup>current affiliation

\* [evgeniyr@smn.uio.no](mailto:evgeniyr@smn.uio.no)

## Supporting Information

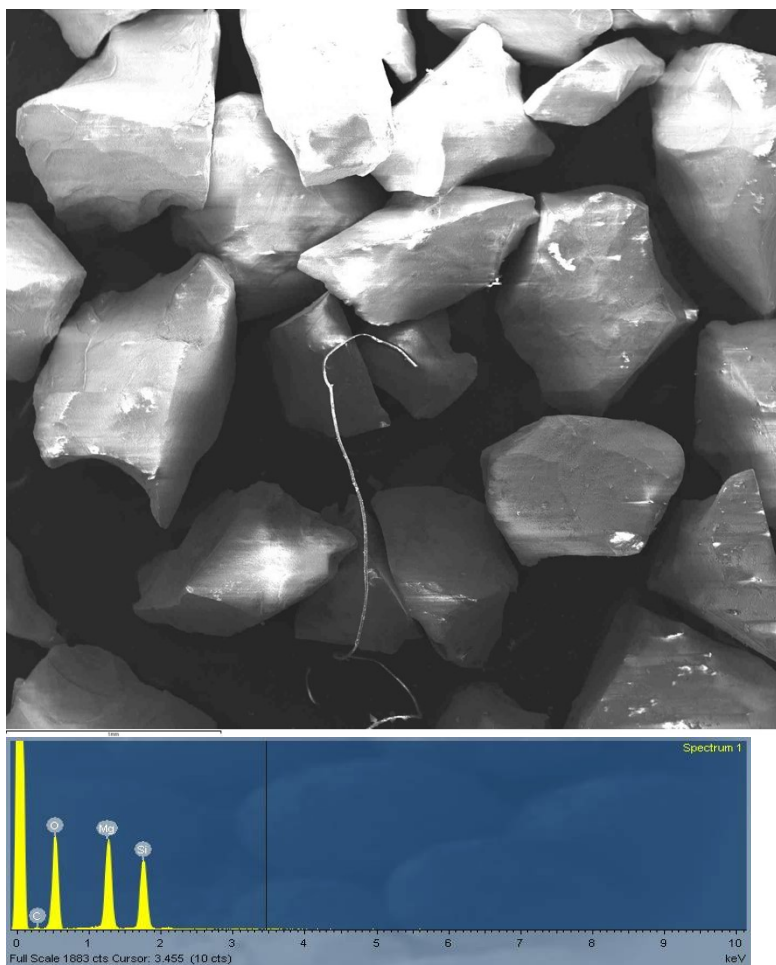

**Figure S1.** SEM/EDX of the 3D quartz support after MgO ALD.

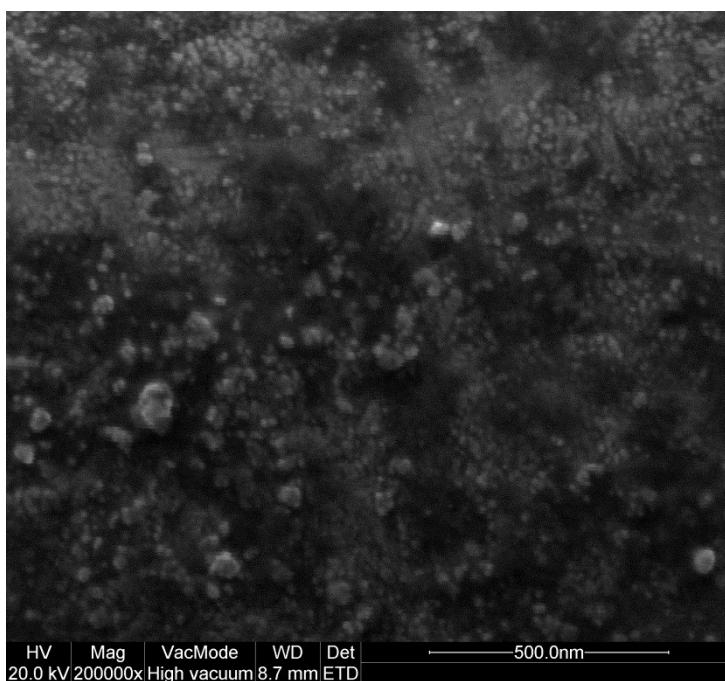

**Figure S2.** SEM/EDX of the 2D Si-wafer support after MgO ALD.

## XPS deconvolution

### Pt4f

| Name     | Position | FWHM | Area/(RSF*T*MF P) | %At Conc | Goodness of Fit |
|----------|----------|------|-------------------|----------|-----------------|
| Pt-M     | 71.29    | 1.20 | 9805.33           | 8.46     | 4440.71         |
| Pt-In    | 70.63    | 0.91 | 46259.3           | 39.92    |                 |
| Pt-In(2) | 73.93    | 0.97 | 34694.4           | 29.94    |                 |
| Pt-M(2)  | 74.59    | 1.19 | 7354              | 6.35     |                 |
| Pt-O     | 72.36    | 1.05 | 3470.86           | 3.00     |                 |
| Pt-O(2)  | 75.66    | 1.57 | 2603.15           | 2.25     |                 |
| Pt-O2    | 72.78    | 3.0  | 6680.12           | 5.76     |                 |
| Pt-O2(2) | 76.08    | 3.44 | 5010.09           | 4.32     |                 |

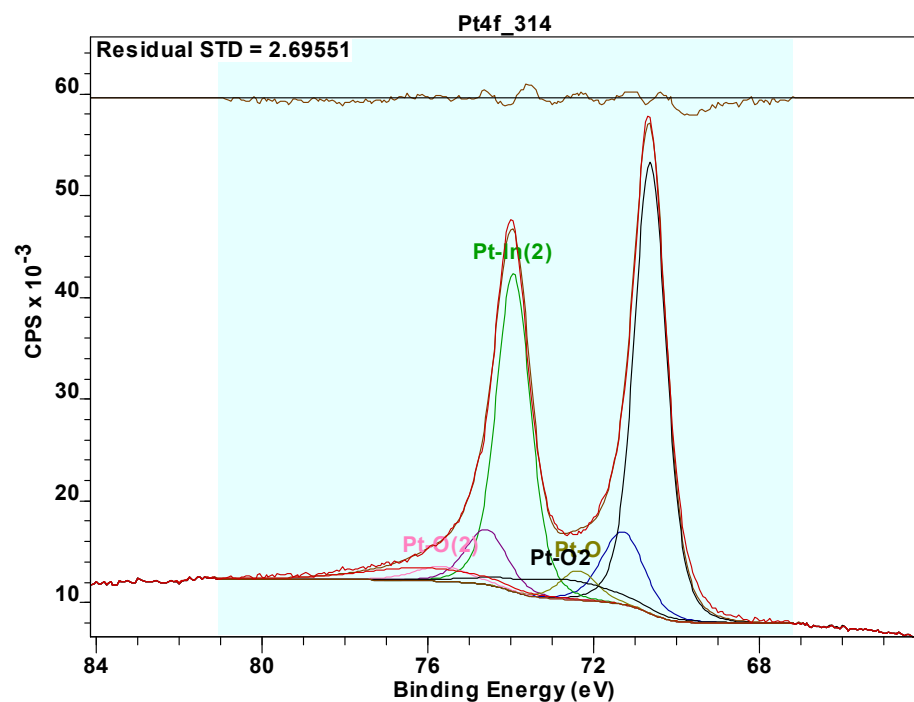

CasaXPS (This string can be edited in CasaXPS.DEF/PrintFootNote.txt)

Two major doublet components can be assigned to the pure Pt metal (71.29/74.59 eV) and the alloyed Pt within PtIn alloy (70.63/73.93 eV), respectively. We have also assessed Pt 4f spectrum of a control Pt/SiO<sub>2</sub> sample using C 1s for normalization in that sample. Metallic Pt gave a single doublet with the 7/2 component at 71.72 eV. To compare this pure Pt peak to the pure Pt component (Pt-M) of our main PtIn/MgO/SiO<sub>2</sub> sample, we also recalibrated Pt 4f 7/2 peak for the latter sample to C 1s to yield 72.17 eV. It can be concluded that the pure Pt in the alloyed sample is up-shifted in BE by 0.45 eV with respect to the monometallic reference sample. It can be hypothesized that this difference is due to a combination of three factors: the difference in Pt particle sizes, the influence of MgO support, and the influence of the PtIn alloy which is in electronic constant with pure Pt domains. The downshift of 0.66 eV observed between the pure metal and alloyed contribution within the PtIn/MgO/SiO<sub>2</sub> sample is a larger effect in comparison with the 0.45 eV upshift between pure metal components in the two samples.

Mg2s

| Name     | Position | FWHM | Area/(RSF*T*MF<br>P) | %At Conc | Goodness of<br>Fit |
|----------|----------|------|----------------------|----------|--------------------|
| Mg2s_295 | 89.03    | 1.95 | 50339.2              | 100      | 1521               |

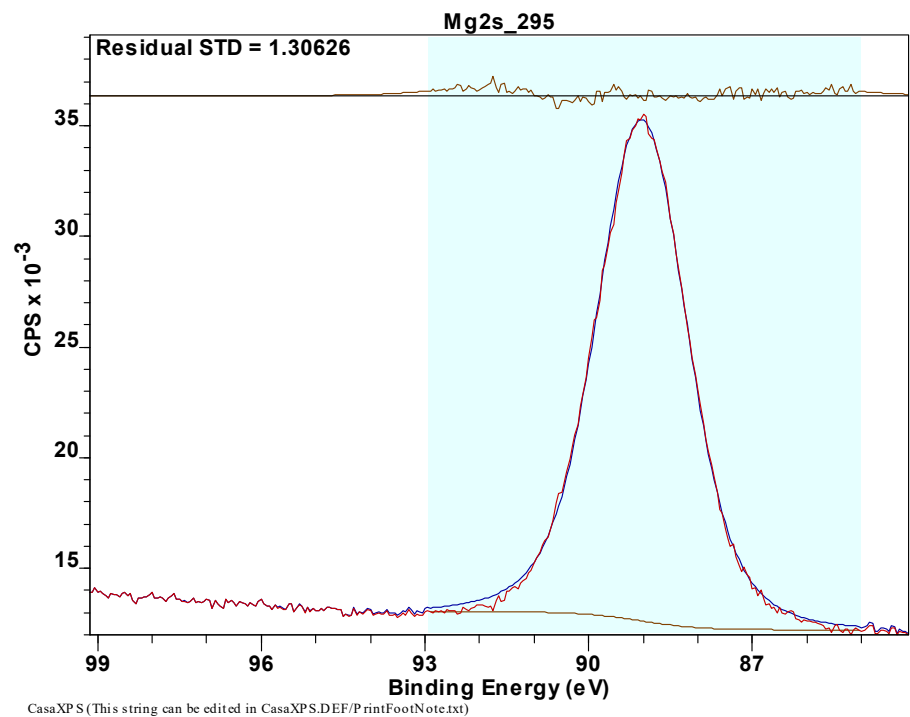

## In3d

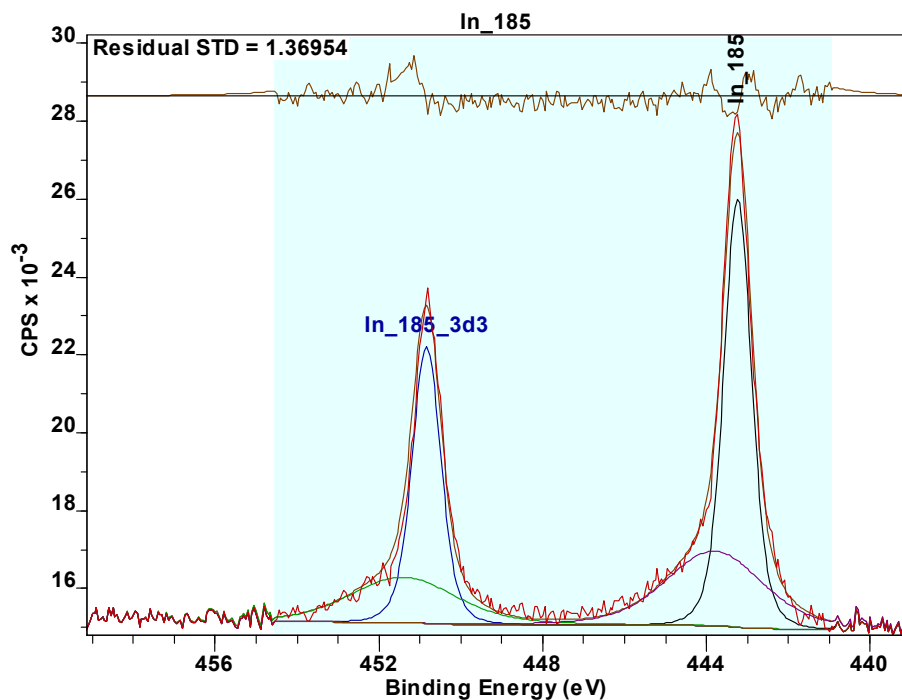

| Name          | Position | FWHM | Area/(RSF*T*MF<br>P) | %At Conc | Goodness of<br>Fit |
|---------------|----------|------|----------------------|----------|--------------------|
| In_185_3d5    | 443.24   | 0.8  | 10024.8              | 37.22    | 2206.58            |
| In_185_3d5bis | 443.80   | 2.8  | 6131.78              | 22.77    |                    |
| In_185_3d3    | 450.84   | 0.82 | 6686.56              | 24.83    |                    |
| In_185_3d3bis | 451.40   | 3.08 | 4089.9               | 15.19    |                    |

## In MNN Auger

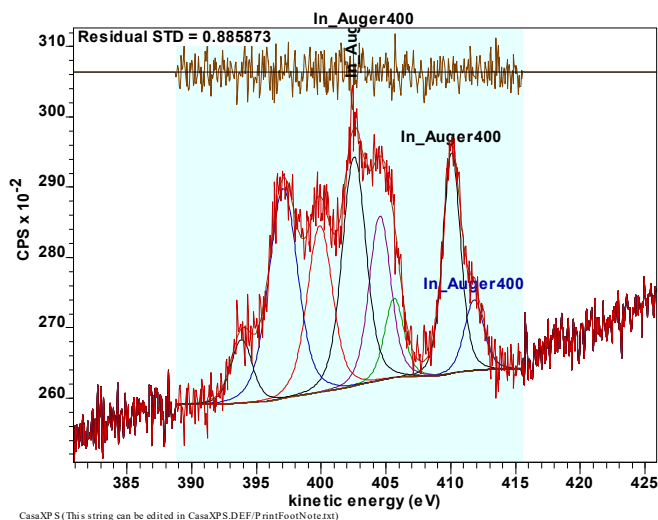

| Name                                                                  | Position<br>(E <sub>kin</sub> ) | FWHM | %At Conc | Goodness of Fit |
|-----------------------------------------------------------------------|---------------------------------|------|----------|-----------------|
| In_Auger400_1                                                         | 411.80                          | 1.75 | 4.96     | 2411.68         |
| In_Auger400_2<br>or In <sub>4</sub> M <sub>4,5</sub> M <sub>4,5</sub> | 410.07                          | 1.61 | 14.26    |                 |
| In_Auger400_3                                                         | 405.63                          | 1.75 | 5.58     |                 |
| In_Auger400_4                                                         | 404.53                          | 1.96 | 12.94    |                 |
| In_Auger400_5<br>or In <sub>5</sub> M <sub>4,5</sub> M <sub>4,5</sub> | 402.54                          | 2.16 | 19.86    |                 |
| In_Auger400_6                                                         | 399.89                          | 2.3  | 15.39    |                 |
| In_Auger400_7                                                         | 397.06                          | 2.62 | 22.04    |                 |
| In_Auger400_8                                                         | 393.85                          | 1.95 | 4.97     |                 |

Based on the PHI element page for In, the kinetic energy of In<sub>4</sub>M<sub>4,5</sub>M<sub>4,5</sub> is required together with the binding energy of In3d, to assess the state of In. Based upon the above tables of fitting, the In<sub>4</sub>M<sub>4,5</sub>M<sub>4,5</sub> Auger peak with E<sub>k</sub> = 410.07eV and the In core level 3d 5/2 peak with the E<sub>b</sub> = 443.24eV result in the Auger parameter of 853.31eV. The latter positions our material in the neighborhood of indium telluride and indium metal.

## C1s:

| Name   | Position | FWHM | Area/(RSF*T*MF<br>P) | %At Conc | Goodness of<br>Fit |
|--------|----------|------|----------------------|----------|--------------------|
| sp2    | 284.09   | 0.86 | 17359.4              | 84.16    | 3442.33            |
| Sp3    | 285.00   | 1.9  | 0                    | 0.0      |                    |
| C-O    | 286.20   | 1.8  | 1286.26              | 6.24     |                    |
| C=O    | 288.60   | 1.8  | 0                    | 0.0      |                    |
| pi-pi* | 290.09   | 4.0  | 1981.27              | 9.61     |                    |

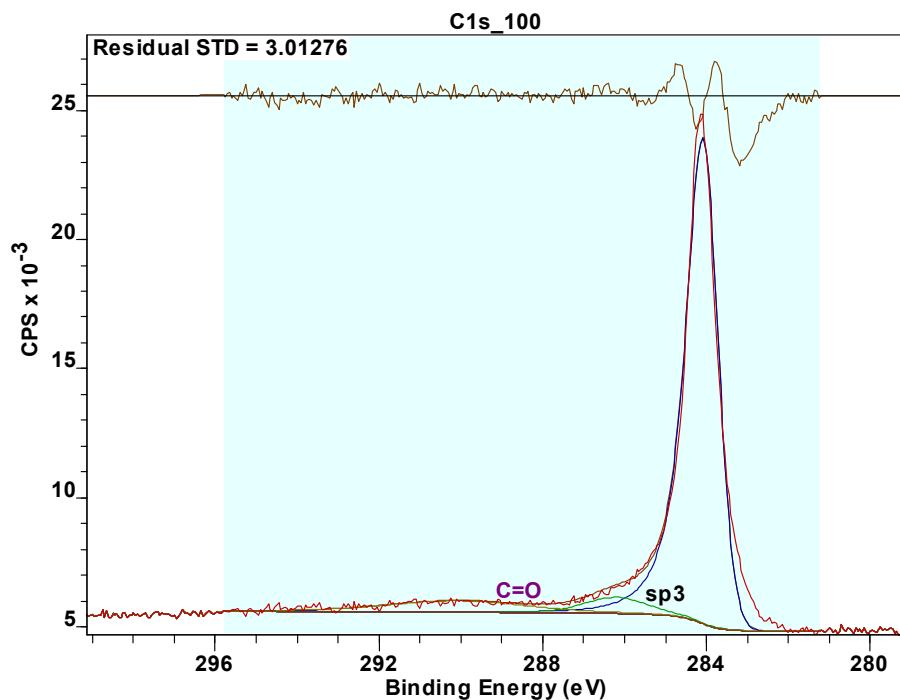

CasaXPS (This string can be edited in CasaXPS.DEF/PrintFootNote.txt)

## Simulation parameters for TAP experiments

### *Theoretical exposure evaluation*

*time of a single pulse simulation:  $t = 0.0$  to  $5.0$  s,  $0.001$  s steps*  
*pulse intensity range:  $N_p = 1e-9$  to  $1e-8$  mol/pulse,  $0.01e-9$  mol steps*  
*number of pulses in the sequence:  $n_{pls} = 0$  to  $1000$  pulses,  $10$  pulses steps*  
*Knudsen diffusivity in the one zone reactor:  $D = 2e-3$  m<sup>2</sup>/s*  
*cross-sectional area of the reactor:  $A = 1.28e-5$  m<sup>2</sup>*  
*length of a single-zone reactor:  $L = 50.0e-3$  m*  
*void fraction of the packed bed:  $\epsilon_{ps} = 0.4$*

### *Experiment evaluation*

*time of a single pulse simulation:  $t = 0.0$  to  $3.0$  s,  $0.001$  s steps*  
*pulse intensity range:  $N_p = 1e-8$  (actual intensities of Ne signal were used for pulse-wise normalization)*  
*number of pulses in the sequence:  $n_{pls} = 0$  to  $490$  pulses*  
*Knudsen diffusivity in the one zone reactor at 800K:  $D_{Ne} = 8.3e-3$  m<sup>2</sup>/s*  
*cross-sectional area of the reactor:  $A = 1.28e-5$  m<sup>2</sup>*  
*length zones in the reactor:  $L = [0.01778, 0.01952, 0.0119]$  m*  
*void fraction of the packed bed:  $\epsilon_{ps} = 0.4$*   
*catalyst loading:  $m_{cat} = 0.280e-3$  kg*  
*concentration of Pt sites:  $C_{Pt} = 0.2e-3$  mol/kg*

The total surface area of the catalyst was estimated assuming quartz density of  $\rho_{SiO_2} = 2.65e3$  kg/m<sup>3</sup>, the mean particle diameter of  $d_p = (250e-6 + 500e-6)/2.0$ .

Numerical parameters:

the number of gridpoints per m of reactor length: 1.d5.

the absolute tolerance passed to subroutine lsode: 1.d-7

the relative tolerance passed to subroutine lsode: 1.d-99
